# Supplementary figures and images for: Depletion of METTL3 alters cellular and extracellular levels of miRNAs containing m6A consensus sequences
Source: PubMed Central journal article supplement — Heliyon. 2021 Dec 2;7(12):e08519. doi: 10.1016/j.heliyon.2021.e08519 (PMC8654799; doi:10.1016/j.heliyon.2021.e08519), 2021-12-02

# Absolute modification levels relative to G content

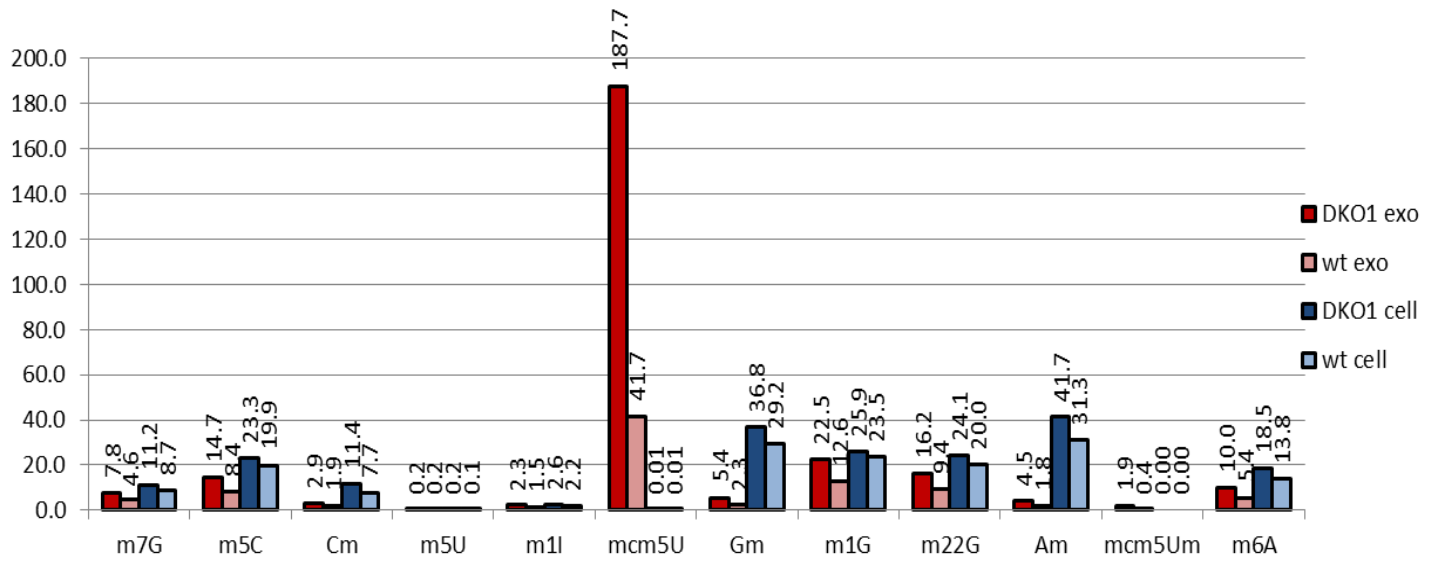

Supplement: mmc1.pdf [file mmc1.pdf]

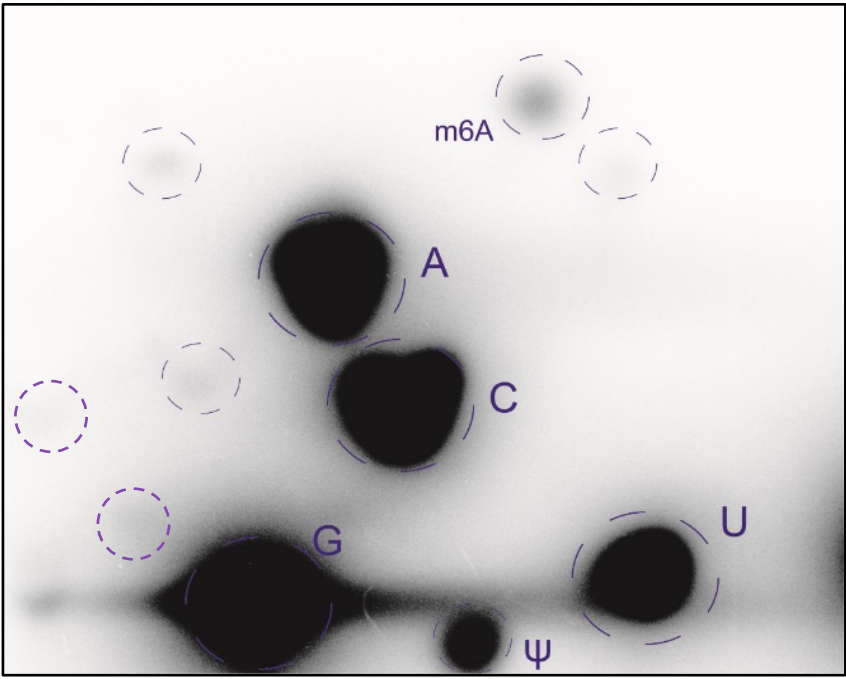

Supplement: mmc2.pdf [file mmc2.pdf]

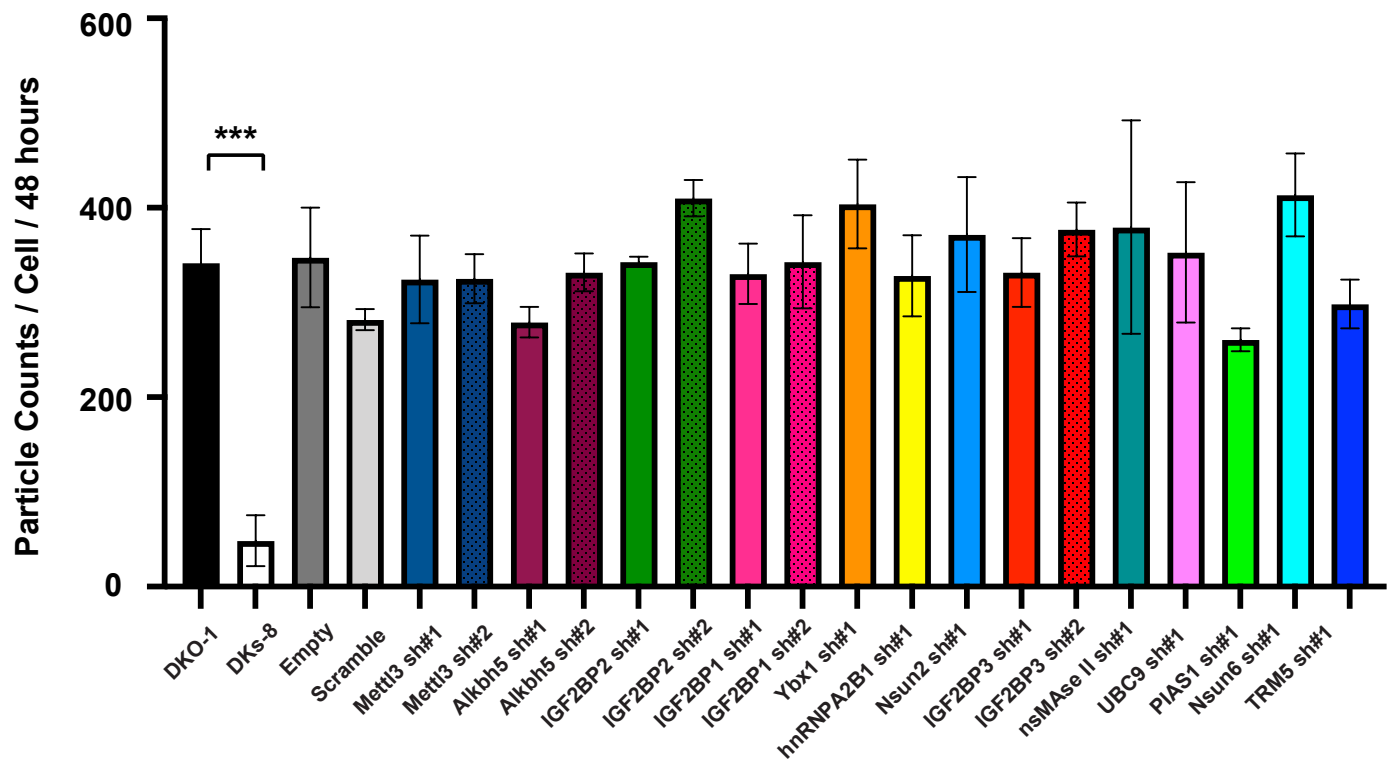

Supplement: mmc3.pdf [file mmc3.pdf]

**A**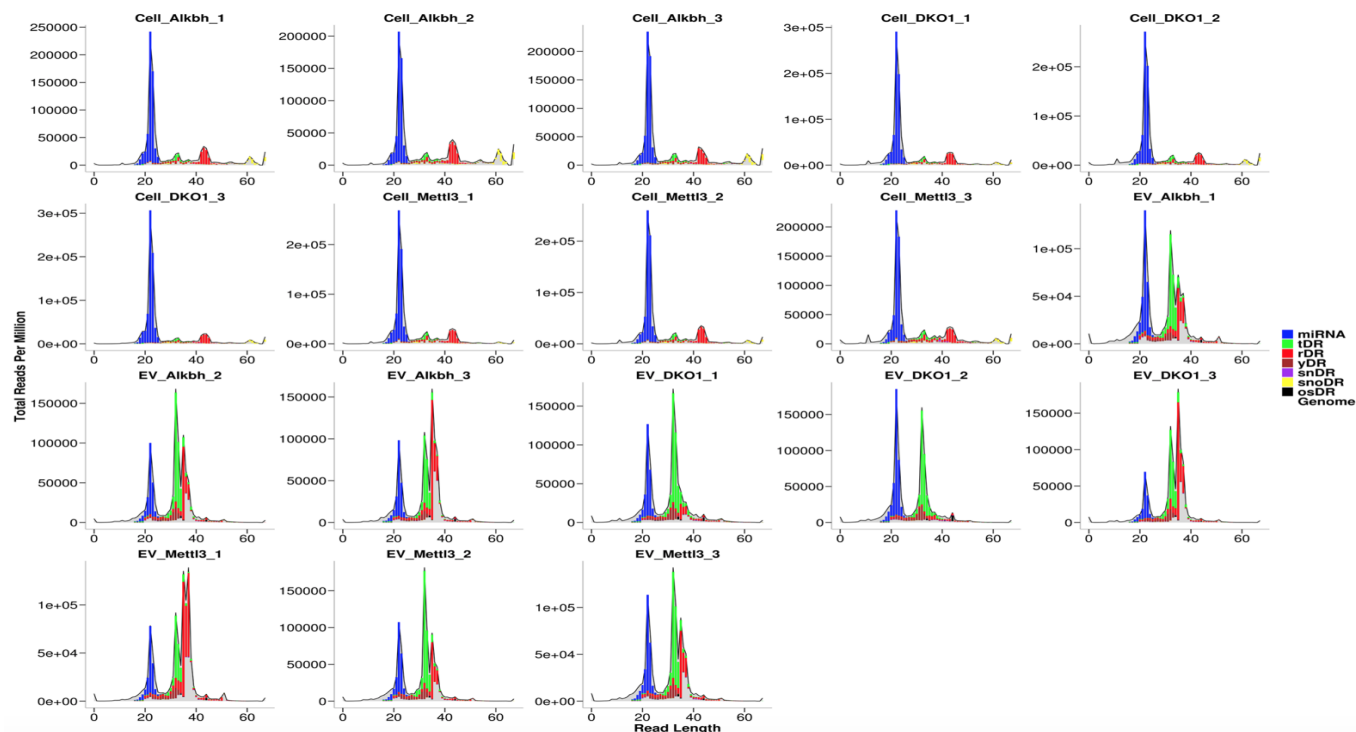**B**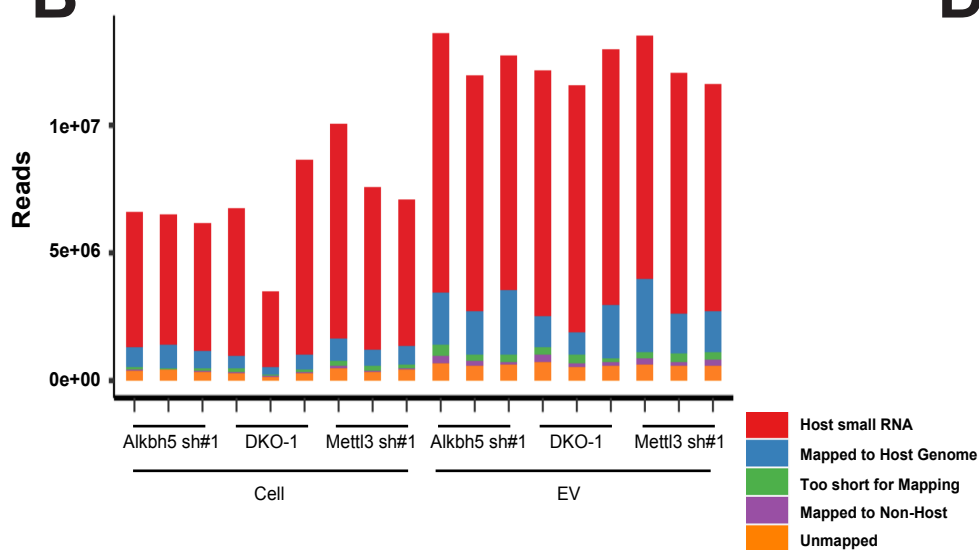**D**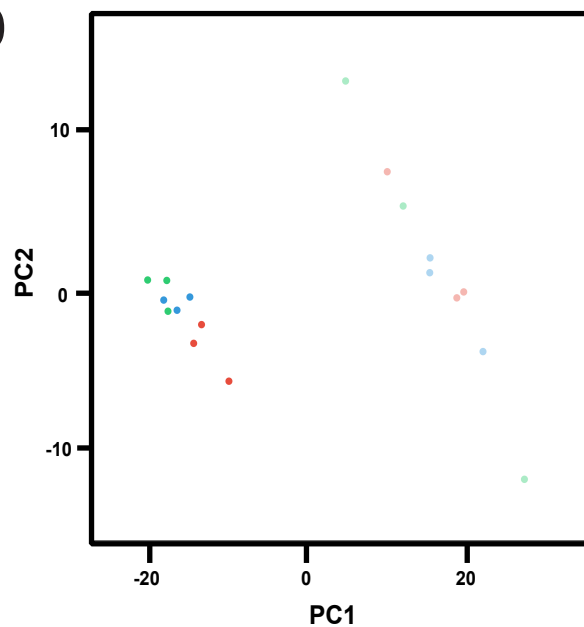**C**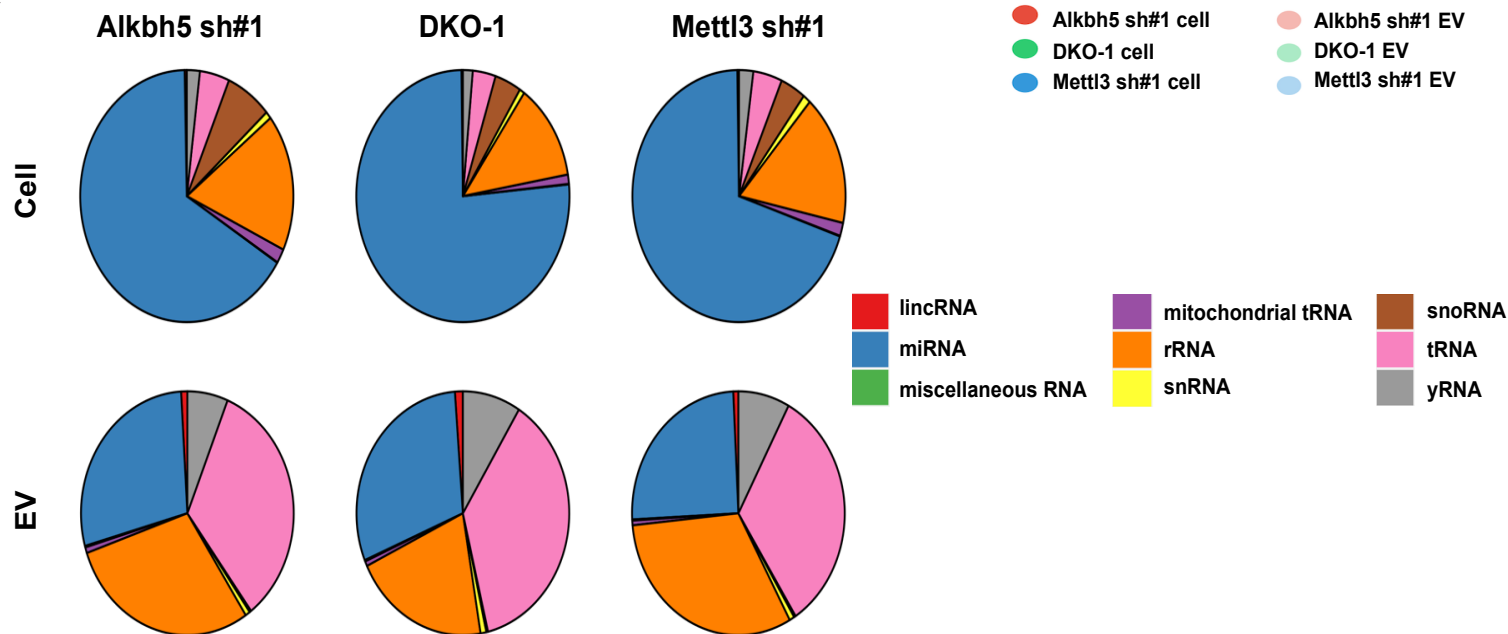

Supplement: mmc4.pdf [file mmc4.pdf]
